# Supplementary material for: Charge transfer vs. dimensionality: what affects the transport properties of ferecrystals?
Source: Royal Society of Chemistry journal article supplement (doi:10.1039/c4nr07338j), 2015-01-01
Supplement: c4nr07338j1.pdf [file c4nr07338j1.pdf]

Figure S1. Rietveld refinement results from XRD-data of  $([\text{SnSe}]_{1+\delta})_4(\text{NbSe}_2)_1$ . Space group:  $P-3m1$

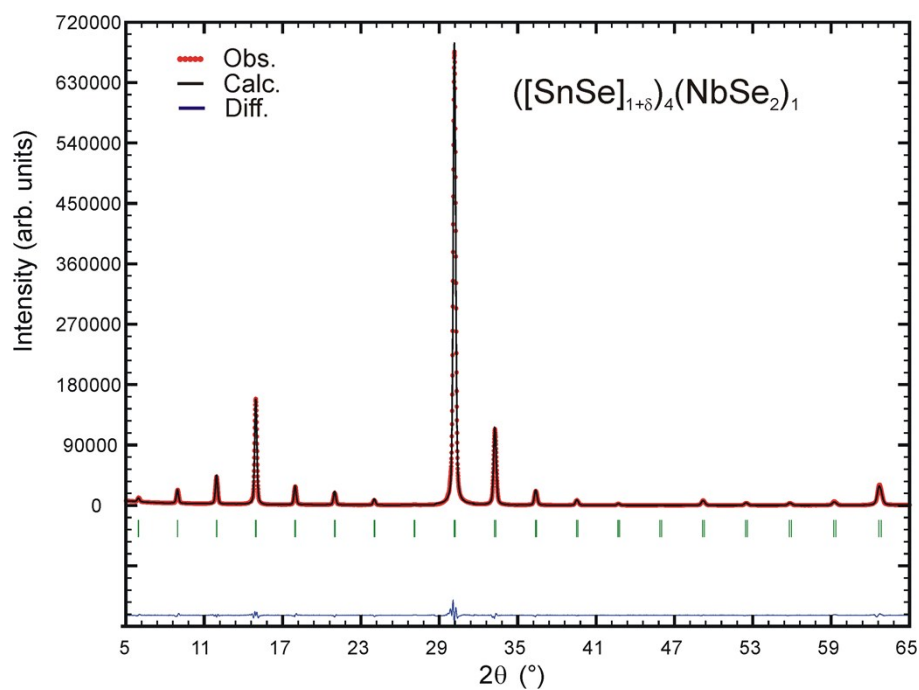

Figure S2. Rietveld refinement results from XRD-data of  $([\text{SnSe}]_{1+\delta})_4(\text{NbSe}_2)_2$ . Space group:  $P-3m1$

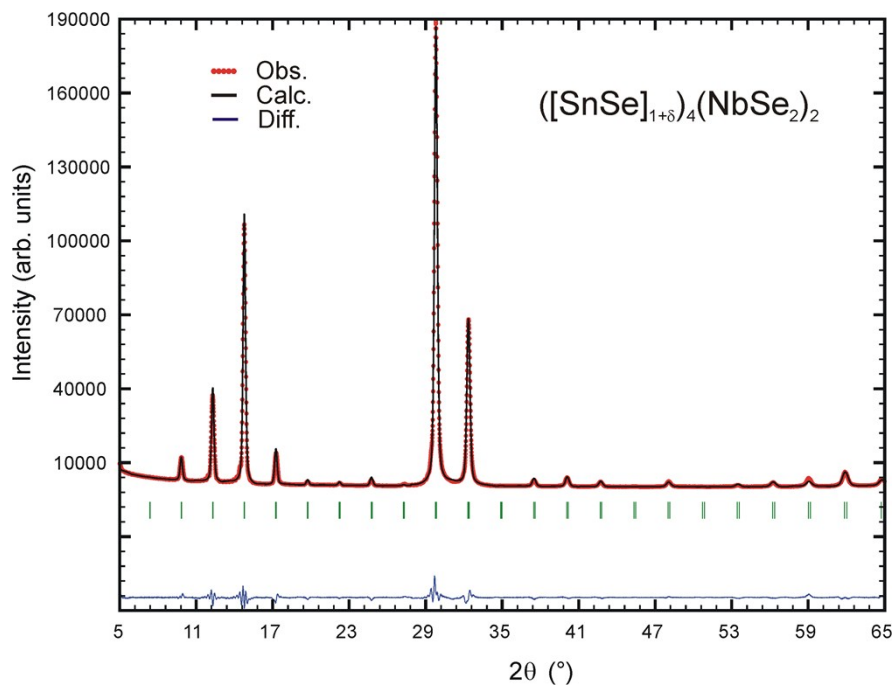

Table S1. Rietveld refinement results from XRD-data. Space group:  $P-3m1$

|                                                                           | (4,2)                                       |                                                                           | (4,1)                                       |
|---------------------------------------------------------------------------|---------------------------------------------|---------------------------------------------------------------------------|---------------------------------------------|
| Composition from refinement                                               | $([\text{SnSe}]_{1.26})_4(\text{NbSe}_2)_2$ | Composition from refinement                                               | $([\text{SnSe}]_{1.22})_4(\text{NbSe}_2)_1$ |
| Radiation                                                                 | Bruker D8, Cu $K_\alpha$                    | Radiation                                                                 | Bruker D8, Cu $K_\alpha$                    |
| $2\theta$ range (degrees)                                                 | $3 \leq 2\theta \leq 65$                    | $2\theta$ range (degrees)                                                 | $3 \leq 2\theta \leq 65$                    |
| $c$ (nm)                                                                  | 3.59712(7)                                  | $c$ (nm)                                                                  | 2.96313(4)                                  |
| Reflections in refinement                                                 | 25                                          | Reflections in refinement                                                 | 20                                          |
| Number of variables                                                       | 19                                          | Number of variables                                                       | 16                                          |
| $R_F = \Sigma  F_o - F_c  / \Sigma F_o$                                   | 0.0386                                      | $R_F = \Sigma  F_o - F_c  / \Sigma F_o$                                   | 0.0176                                      |
| $R_I = \Sigma  I_o - I_c  / \Sigma I_o$                                   | 0.0276                                      | $R_I = \Sigma  I_o - I_c  / \Sigma I_o$                                   | 0.0176                                      |
| $R_{wP} = [\Sigma w_i  y_{oi} - y_{ci} ^2 / \Sigma w_i  y_{oi} ^2]^{1/2}$ | 0.0842                                      | $R_{wP} = [\Sigma w_i  y_{oi} - y_{ci} ^2 / \Sigma w_i  y_{oi} ^2]^{1/2}$ | 0.0693                                      |
| $R_P = \Sigma  y_{oi} - y_{ci}  / \Sigma  y_{oi} $                        | 0.0555                                      | $R_P = \Sigma  y_{oi} - y_{ci}  / \Sigma  y_{oi} $                        | 0.0446                                      |
| $R_e = [(N - P + C) / (\Sigma w_i y_{oi}^2)]^{1/2}$                       | 0.0163                                      | $R_e = [(N - P + C) / (\Sigma w_i y_{oi}^2)]^{1/2}$                       | 0.0123                                      |
| $\chi^2 = (R_{wP} / R_e)^2$                                               | 26.8                                        | $\chi^2 = (R_{wP} / R_e)^2$                                               | 36.0                                        |
| <b>Atom parameters</b>                                                    |                                             |                                                                           |                                             |
| Se1 in $2c(z), z$                                                         | 0.04374(4)                                  | Nb1 in $1a(\theta)$                                                       |                                             |
| Occ.                                                                      | 1.0                                         | Occ.                                                                      | 1.0                                         |
| Nb1 in $2c(z), z$                                                         | 0.08874(3)                                  | Se1 in $2c(z), z$                                                         | 0.05534(2)                                  |
| Occ.                                                                      | 1.0                                         | Occ.                                                                      | 1.0                                         |
| Se2 in $2c(z), z$                                                         | 0.13369(3)                                  | Sn1 in $2c(z), z$                                                         | 0.15449(6)                                  |
| Occ.                                                                      | 1.0                                         | Occ.                                                                      | 1.22(1)                                     |
| Sn1 in $2c(z), z$                                                         | 0.21405(6)                                  | Se2 in $2c(z), z$                                                         | 0.1679(1)                                   |
| Occ.                                                                      | 1.26(1)                                     | Occ.                                                                      | 1.22(1)                                     |
| Se3 in $2c(z), z$                                                         | 0.2268(1)                                   | Se3 in $2c(z), z$                                                         | 0.2462(1)                                   |
| Occ.                                                                      | 1.26(1)                                     | Occ.                                                                      | 1.22(1)                                     |
| Se4 in $2c(z), z$                                                         | 0.2911(1)                                   | Sn2 in $2c(z), z$                                                         | 0.25743(6)                                  |
| Occ.                                                                      | 1.26(1)                                     | Occ.                                                                      | 1.22(1)                                     |
| Sn2 in $2c(z), z$                                                         | 0.2986(1)                                   | Sn3 in $2c(z), z$                                                         | 0.35111(7)                                  |
| Occ.                                                                      | 1.26(1)                                     | Occ.                                                                      | 1.22(1)                                     |
| Sn3 in $2c(z), z$                                                         | 0.37713(7)                                  | Se4 in $2c(z), z$                                                         | 0.3621(1)                                   |
| Occ.                                                                      | 1.26(1)                                     | Occ.                                                                      | 1.22(1)                                     |
| Se5 in $2c(z), z$                                                         | 0.3848(1)                                   | Se5 in $2c(z), z$                                                         | 0.4429(1)                                   |
| Occ.                                                                      | 1.26(1)                                     | Occ.                                                                      | 1.22(1)                                     |
| Se6 in $2c(z), z$                                                         | 0.45507(2)                                  | Sn4 in $2c(z), z$                                                         | 0.4530(1)                                   |
| Occ.                                                                      | 1.26(1)                                     | Occ.                                                                      | 1.22(1)                                     |
| Sn4 in $2c(z), z$                                                         | 0.45895(2)                                  |                                                                           |                                             |
| Occ.                                                                      | 1.26(1)                                     |                                                                           |                                             |
